# Supplementary material
Source: Royal Society of Chemistry journal article supplement (doi:10.1039/d6ma00355a)
Supplement: d6ma00355a1.pdf [file d6ma00355a1.pdf]

# Degradation or Adsorption? Revisiting Organic Dye Removal by Two Morphologies of $\text{InVO}_4$

Hassan Esmaili<sup>1\*</sup>, Roozbeh Izadi<sup>1</sup>, Amirhossein Ahmadnezhad<sup>1</sup>, Astita Dubey<sup>1,2</sup>, Marianela Escobar-Castillo<sup>1</sup>, and Doru. C. Lupascu<sup>1\*</sup>

## Supporting Information.

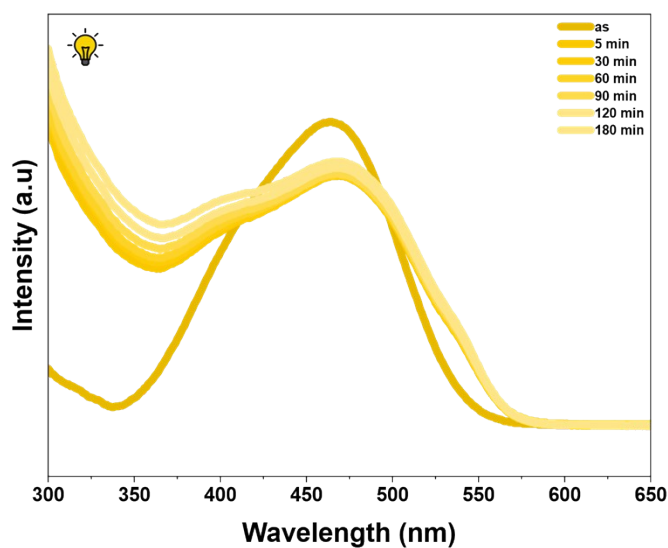

**Figure S 1.** Methyl Orange removal under light irradiation, using the IVO-R sample at different time intervals (IVO-R dosage:  $0.1 \text{ g L}^{-1}$ , dye concentration  $5 \text{ mg L}^{-1}$ ).

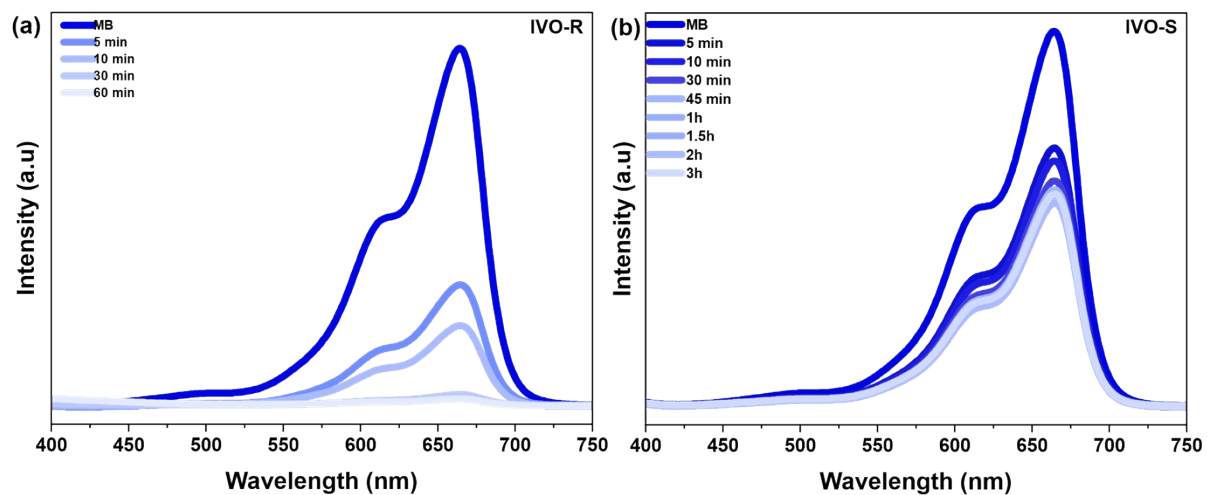

**Figure S 2.** Adsorption of MB dyes using (a) IVO-R and (b) IVO-S (adsorbent dosage: 0.1 g L<sup>-1</sup>, MB concentration: 5 mg L<sup>-1</sup>, experiment time 3h).

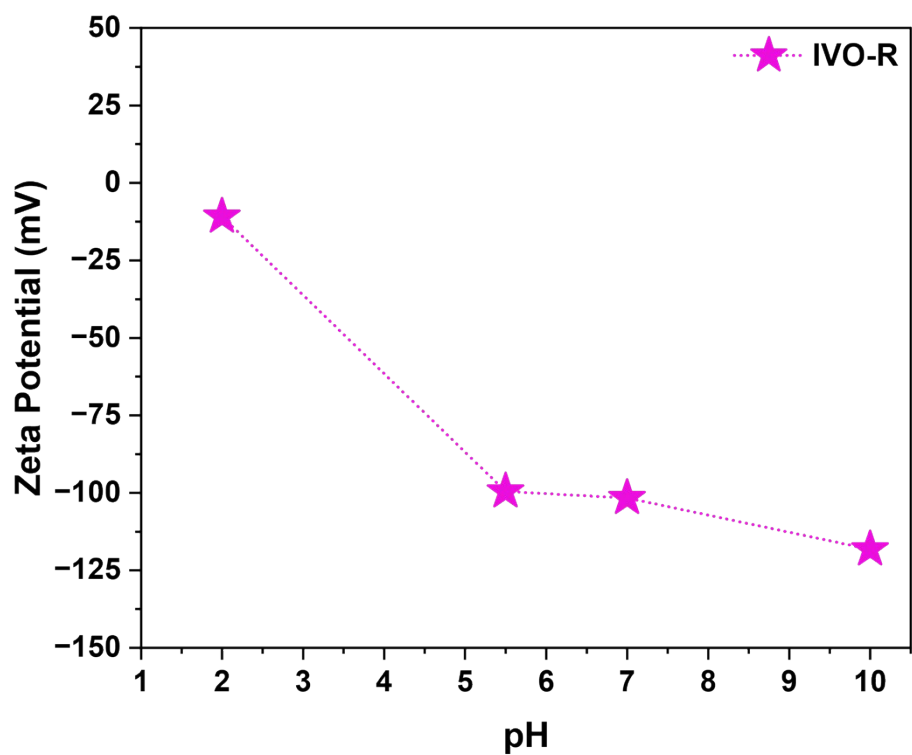

**Figure S 3.** Zeta Potential of IVO-R sample at different pH values and zeta potential of MB.

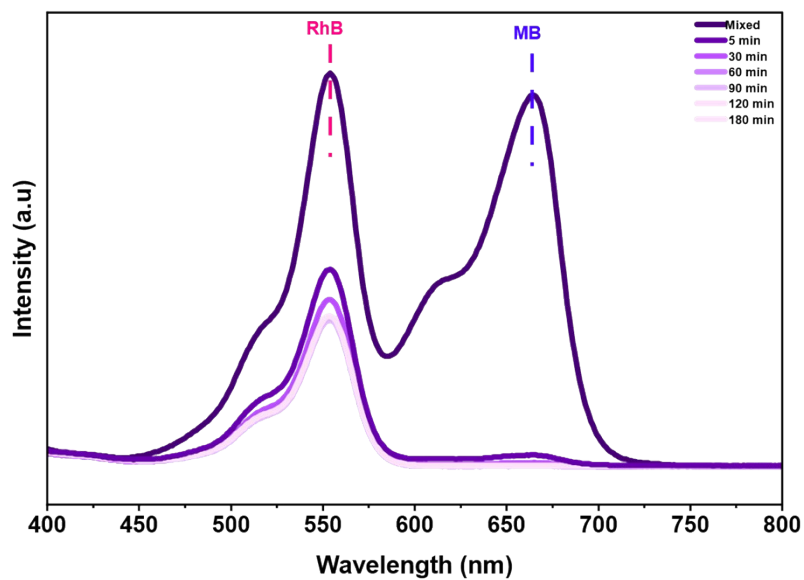

**Figure S 4.** Adsorption of mixed RhB/MB, using the IVO-R sample at different time intervals (IVO-R dosage: 0.15 g L<sup>-1</sup>, dye concentration 40 mg L<sup>-1</sup>).

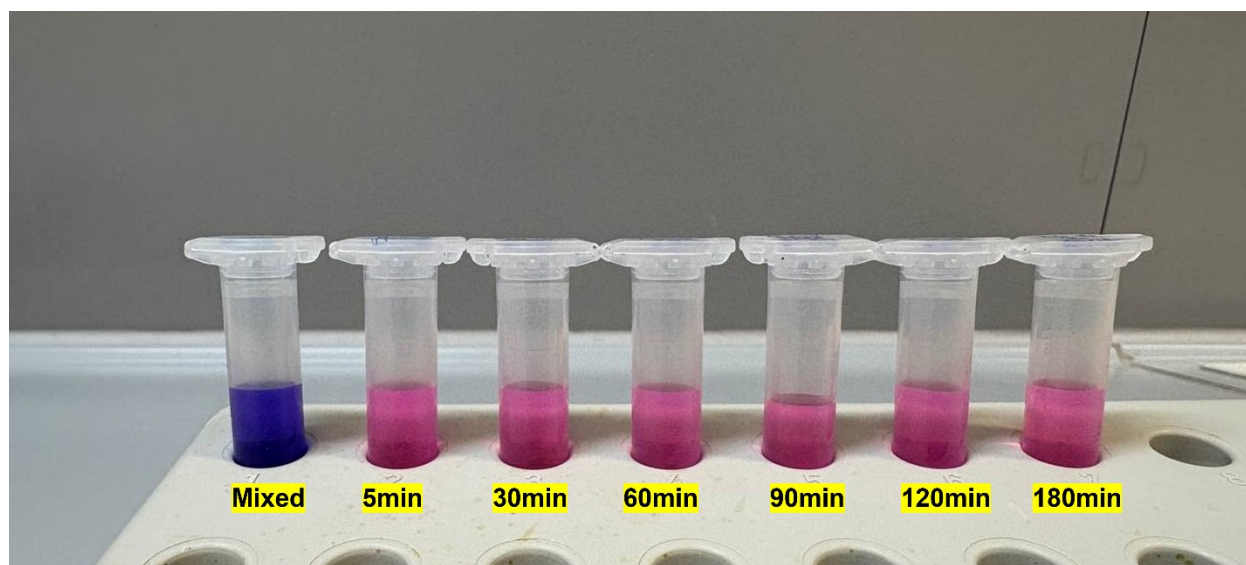

**Figure S 5.** Adsorption of mixed RhB/MB (1:1, 40 mg L<sup>-1</sup>) by the IVO-R sample (adsorbent dosage: 0.15 g L<sup>-1</sup>).

**Table S 1.** Structural and chemical characteristics of MB, RhB and MO dyes used in this study. <sup>1-3</sup>

| Dye Name              | Chemical Formula        | Dye Type | Structural Class | Molecular Structure                                                                 |
|-----------------------|-------------------------|----------|------------------|-------------------------------------------------------------------------------------|
| <b>Methylene Blue</b> | $C_{16}H_{18}C_1N_3S$   | Basic    | Phenothiazine    | 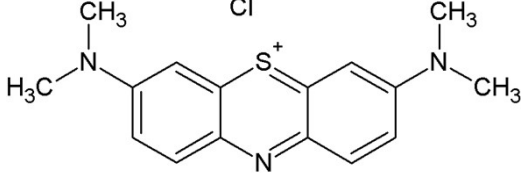  |
| <b>Rhodamine B</b>    | $C_{28}H_{31}C_1N_2O_3$ | Basic    | Xanthene         |   |
| <b>Methyl Orange</b>  | $C_{14}H_{14}N_3NaO_3S$ | Acid     | Azo              |  |

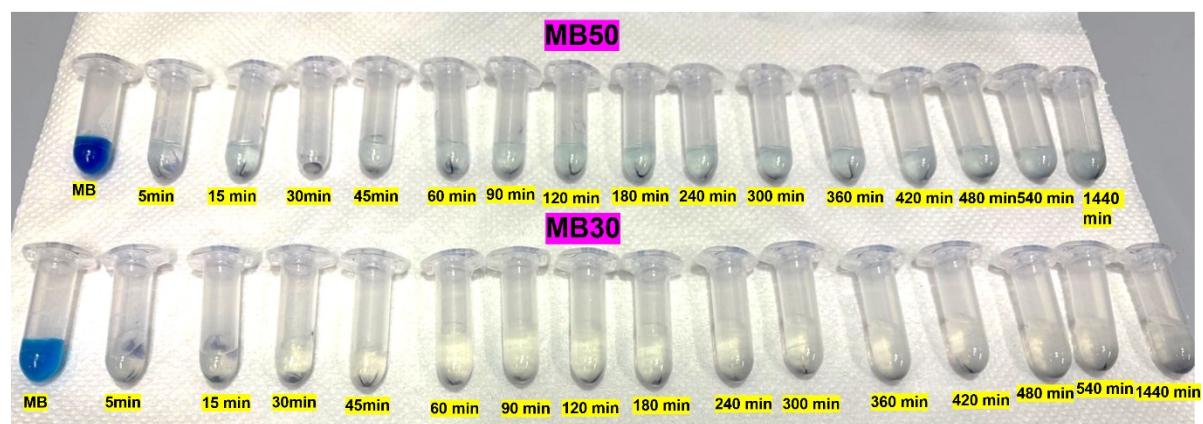

**Figure S 6.** Adsorption of MB by the IVO-R sample at two different initial MB concentrations (30 and 50 g L<sup>-1</sup>) for the adsorption kinetics study.

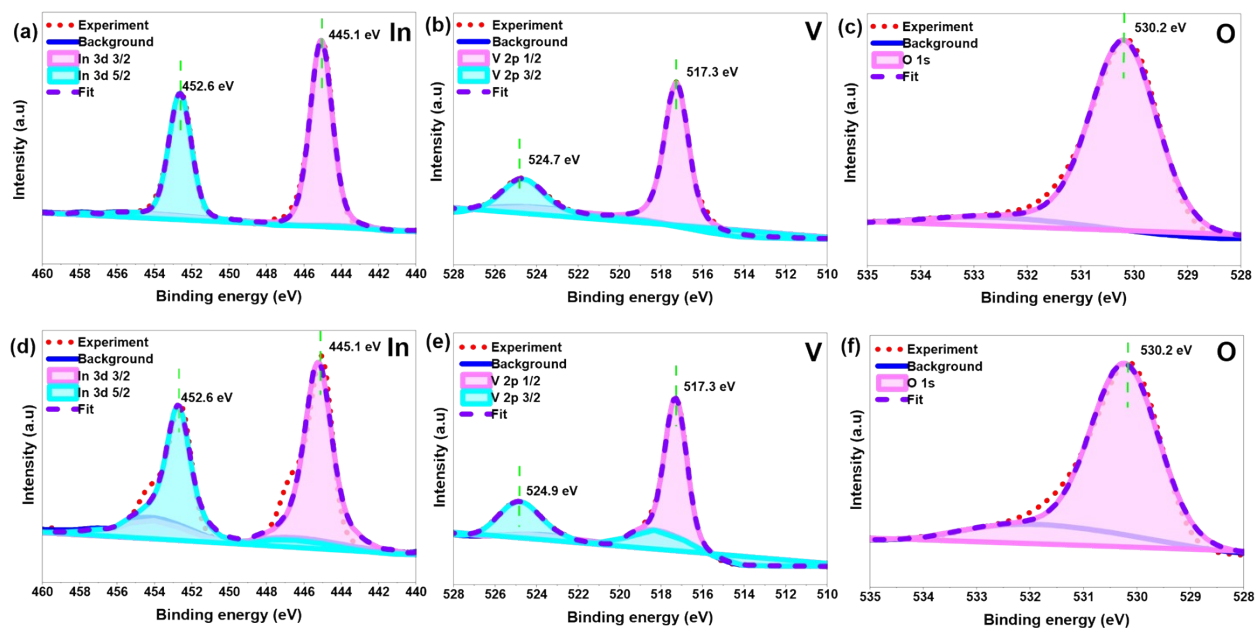

**Figure S 7.** XPS analysis of (a-c) IVO-R and (d-f) IVO-R after adsorption.

**Table S 2.** Comparison of Methylene Blue adsorption capacity of different adsorbents.

| Absorbent                                        | Adsorption Capacity<br>( $\text{mg} \cdot \text{g}^{-1}$ ) | Reference     |
|--------------------------------------------------|------------------------------------------------------------|---------------|
| <b>InVO<sub>4</sub></b>                          | 290                                                        | Present Study |
| <b>Carbon Nanotubes</b>                          | 35.4- 64.7                                                 | 4             |
| <b>Activated Carbon</b>                          | 435                                                        | 5             |
| <b>Rice Husk</b>                                 | 40.58                                                      | 6             |
| <b>Graphene</b>                                  | 153.85                                                     | 7             |
| <b>Fe<sub>3</sub>O<sub>4</sub>@ MIL-100 (Fe)</b> | 49.41                                                      | 8             |
| <b>MnFe<sub>2</sub>O<sub>4</sub></b>             | 44.90                                                      | 9             |
| <b>MnOx @ cotton fibers</b>                      | 46.30                                                      | 10            |

## Reference

1. T. S. Hui and M. A. A. Zaini, *Jurnal Teknologi (Sciences & Engineering)*, 2015, 74.
2. P. L. Meena, J. K. Saini, A. K. Surela, K. Poswal and L. K. Chhachhia, *Biomass Conversion and Biorefinery*, 2024, 14, 1711-1730.
3. Y. Al-Abdallat, I. Jum'h, A. Al Bsoul, R. Jumah and A. Telfah, *Water, Air, & Soil Pollution*, 2019, 230, 277.
4. Y. Yao, F. Xu, M. Chen, Z. Xu and Z. Zhu, *Bioresource technology*, 2010, 101, 3040-3046.
5. K. Legrouri, E. Khouya, M. Ezzine, H. Hannache, R. Denoyel, R. Pallier and R. Naslain, *Journal of hazardous materials*, 2005, 118, 259-263.
6. V. Vadivelan and K. V. Kumar, *Journal of colloid and interface science*, 2005, 286, 90-100.
7. T. Liu, Y. Li, Q. Du, J. Sun, Y. Jiao, G. Yang, Z. Wang, Y. Xia, W. Zhang and K. Wang, *Colloids and Surfaces B: Biointerfaces*, 2012, 90, 197-203.
8. Y. Shao, L. Zhou, C. Bao, J. Ma, M. Liu and F. Wang, *Chemical Engineering Journal*, 2016, 283, 1127-1136.
9. X. Wu, Z. Ding, W. Wang, N. Song, S. Khaimanov and N. Tsidaeva, *Powder Technology*, 2016, 295, 59-68.
10. J. Wang, L. Kou, Z. Huang and L. Zhao, *RSC advances*, 2018, 8, 21577-21584.
